# Supplementary material
Source: PubMed Central journal article supplement (PMC4899257)
Supplement: NIHMS786310-supplement-Supporting_Figures_and_Tables.pdf [file NIHMS786310-supplement-Supporting_Figures_and_Tables.pdf]

## Supporting Information for

### QD-based Fluorescent Ratiometric FRET Sensing for Bisulfide *in vitro*

Armen Shamirian,<sup>a</sup> Hamid Samareh Afsari,<sup>a</sup> Donghui Wu,<sup>b</sup> Lawrence W. Miller,<sup>a</sup> Preston T. Snee<sup>a,\*</sup> *a. Department of Chemistry, University of Illinois at Chicago, 845 West Taylor Street, Chicago, Illinois 60607-7061, United States. b. Colgate-Palmolive Global Technology Center 909 River Road, Piscataway, NJ 08855-1343, United States.*

| <i>Index</i>                                                                                                                                                                                                                        | <i>Page</i> |
|-------------------------------------------------------------------------------------------------------------------------------------------------------------------------------------------------------------------------------------|-------------|
| Figure S1. <sup>1</sup> H NMR spectrum of 6-carboxyrhodamine B.                                                                                                                                                                     | S2          |
| Figure S2. <sup>1</sup> H NMR spectrum of 6-carboxytetraethylrhodamine N-hydroxysuccinimide ester.                                                                                                                                  | S2          |
| Figure S3. <sup>1</sup> H NMR spectrum of the bisulfide-reactive carboxyrhodamine B dye (compound 8 from Scheme 2 of the main text).                                                                                                | S3          |
| Figure S4. Absorbance and emission spectra of the bisulfide-reactive dye and quantum yield data on water-soluble quantum dots.                                                                                                      | S4          |
| Figure S5. Absorption spectra used in the calculation of QD-dye coupling reaction efficiency and in the determination of the dye:QD ratio.                                                                                          | S4          |
| Figure S6. Fluorescence spectra reveal high FRET efficiency via quenching of the emission of the quantum dot (PVC modified and unmodified) donor.                                                                                   | S5          |
| Figure S7. Photoluminescence excitation spectra of water-soluble QDs (PVC modified and unmodified) and the same conjugated to the bisulfide-reactive carboxyrhodamine dye.                                                          | S5          |
| Figure S8. Absorption spectra of QD-dye coupled chromophore dialysis filtrate reveals the cleavage of the QD-S-S-dye bond upon exposure to bisulfide.                                                                               | S6          |
| Figure S9. Emission spectra and calibration data of a QD/rhodamine B piperazine conjugated chromophore in the presence of increasing concentrations of Na <sub>2</sub> S.                                                           | S6          |
| Figure S10. Absorbance of Rhodamine B piperazine and compound 8 in the presence of Na <sub>2</sub> S.                                                                                                                               | S7          |
| Figure S11. Raw emission spectra of (PVC modified and unmodified) QD/dye and conjugates as a function of Na <sub>2</sub> S exposure.                                                                                                | S7          |
| Figure S12. Emission spectra and calibration data of a PVC modified QD/bisulfide-reactive carboxyrhodamine dye (3.4 × 10 <sup>-8</sup> M) conjugated chromophore in the presence of increasing concentrations of Na <sub>2</sub> S. | S8          |
| Figure S13. DLS data on QDs modified with PVC.                                                                                                                                                                                      | S8          |
| Figure S14. Fluorescence images of QDs microinjected into live Hela cells before and after treatment with Na <sub>2</sub> S solution.                                                                                               | S9          |
| Figure S15. Calibration of the ratiometric response from standards imaged using a fluorescent microscope.                                                                                                                           | S9          |
| Table S1. QD-Dye signal intensities inside of live cells before and after treatment with Na <sub>2</sub> S solution.                                                                                                                | S10         |
| Table S2. Control QD signal intensities inside of live cells before and after treatment with Na <sub>2</sub> S solution                                                                                                             | S11         |

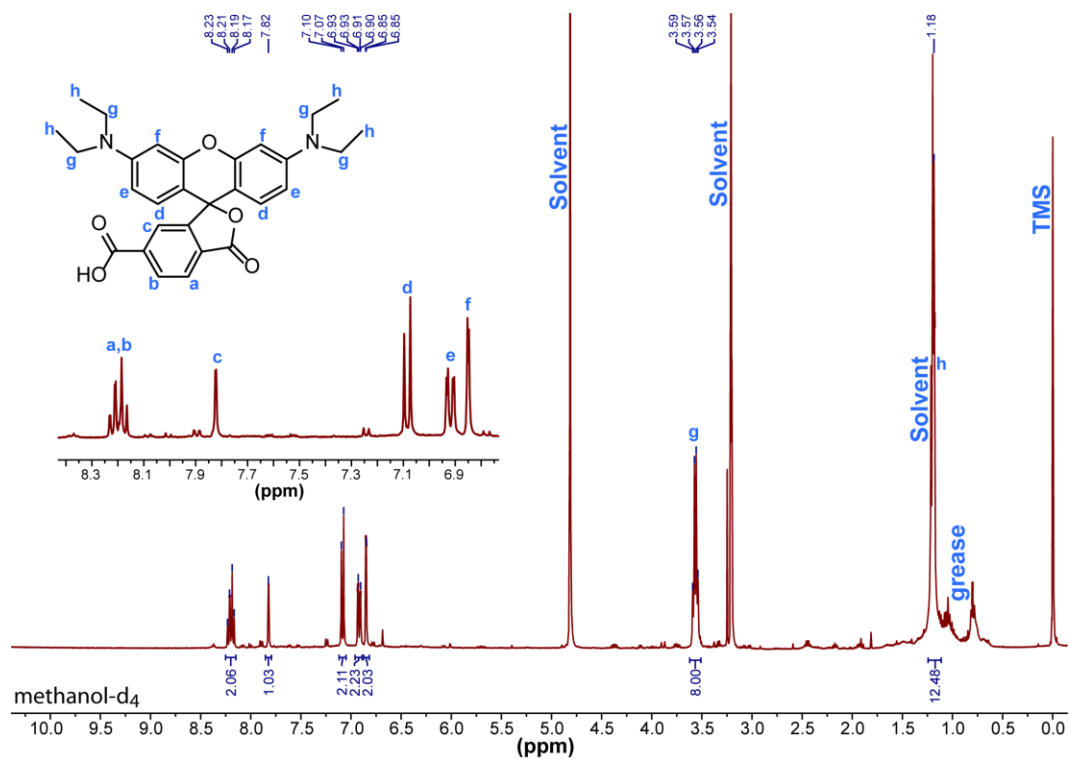

**Figure S1.** <sup>1</sup>H NMR spectrum of 6-carboxyrhodamine B (structure shown in the inset).

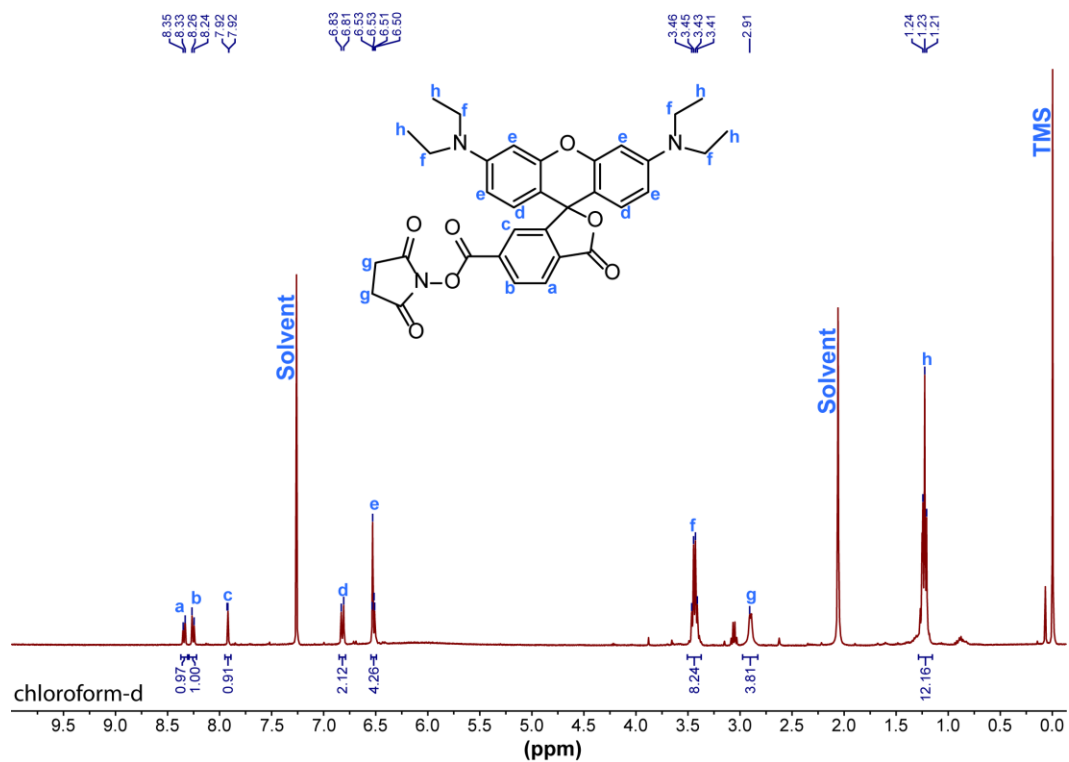

**Figure S2.** <sup>1</sup>H NMR spectrum of 6-carboxytetraethylrhodamine N-hydroxysuccinimide ester (structure shown in the inset).

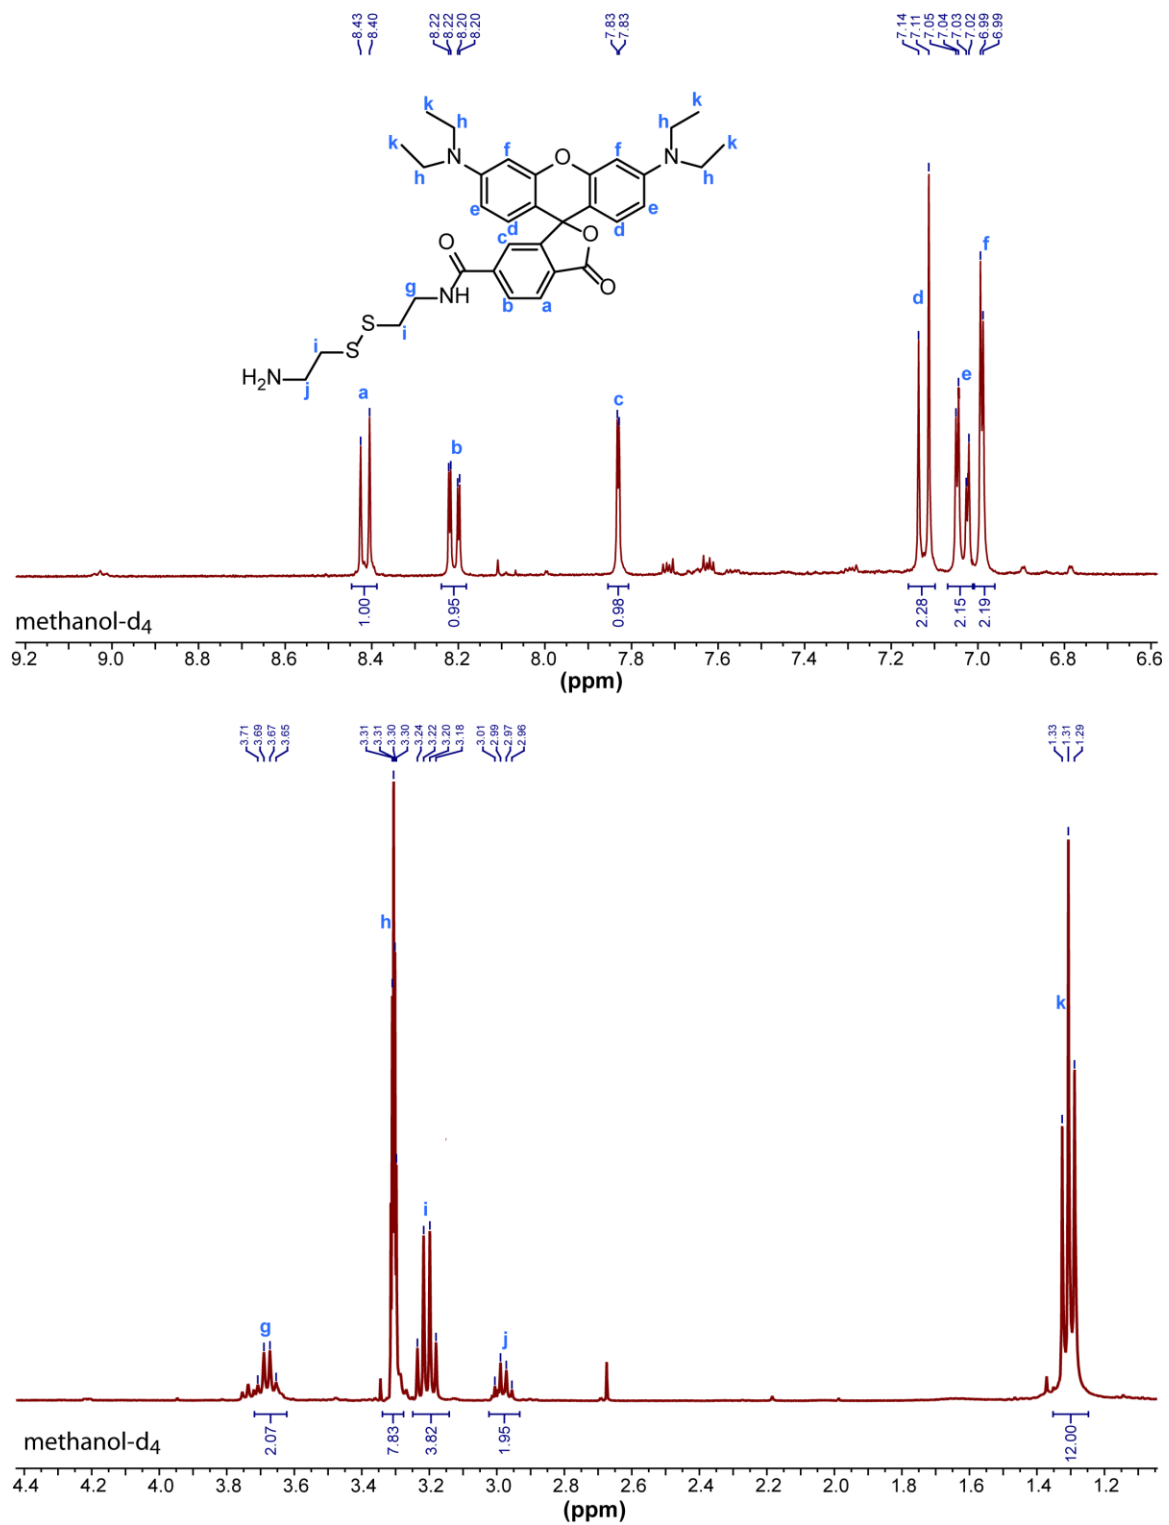

**Figure S3.** <sup>1</sup>H NMR spectrum of compound 8 in the aromatic (top) and aliphatic (bottom) regions (structure shown in the inset).

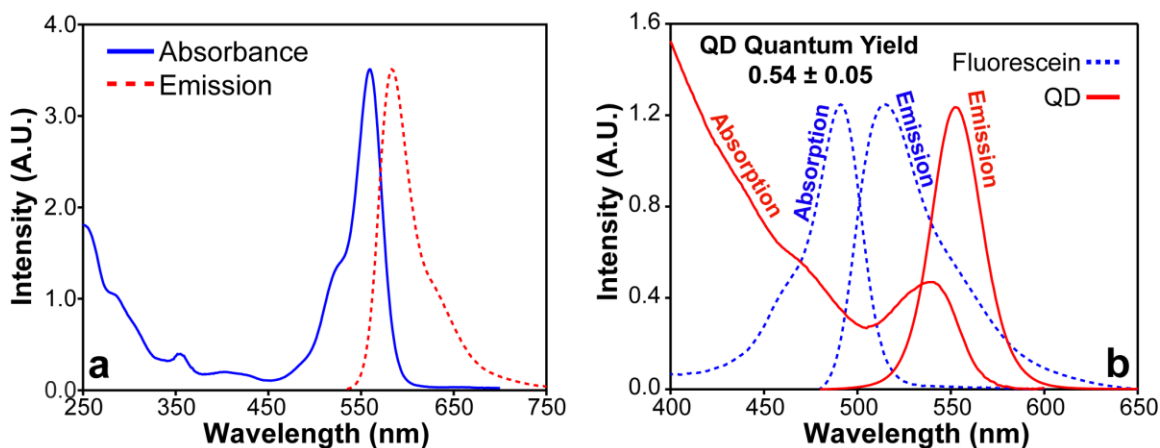

**Figure S4.** (a) Absorbance and emission spectra of the bisulfide-reactive carboxyrhodamine dye (compound 8). (b) The water-soluble CdSe/ZnS QDs used for the cell imaging / sensing studies have a quantum yield of  $0.54 \pm 0.05$ . Fluorescein in 0.1M NaOH was used as a standard (Ex. at 470 nm QY  $0.91 \pm 0.05$ ), see Porres et al. *J. Fluoresc.*, **2006**, *16*, 267-272.

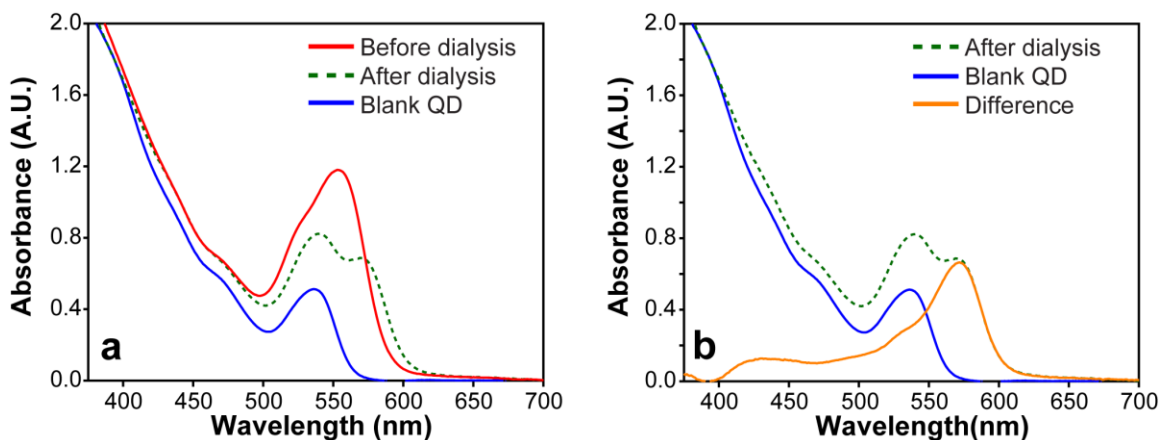

**Figure S5.** (a) The dye conjugation reaction yield (42%) was calculated from the ratio of the integrated dye absorption of the QD/bisulfide-reactive dye conjugate system before and after dialysis. (b) Subtraction of the blank QD from the QD-dye conjugate absorption reveals Rhodamine B dye-like features that were used to calculate of number of the dyes per QD.

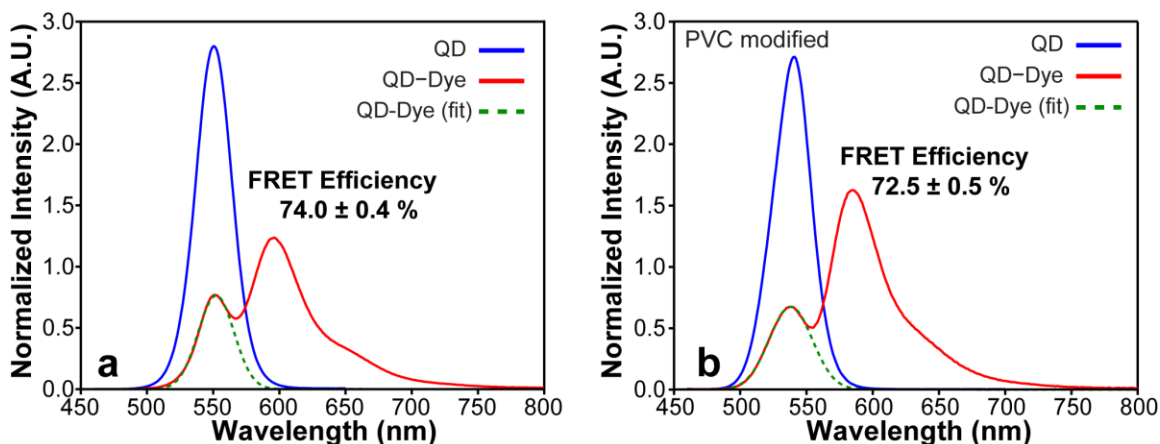

**Figure S6.** The FRET efficiency of the (a) unmodified and (b) PVC modified (“plastic coated”) QD/bisulfide-reactive dye conjugates was determined by measuring the quenching of the donor only fluorescence and after conjugation to the energy accepting dye.

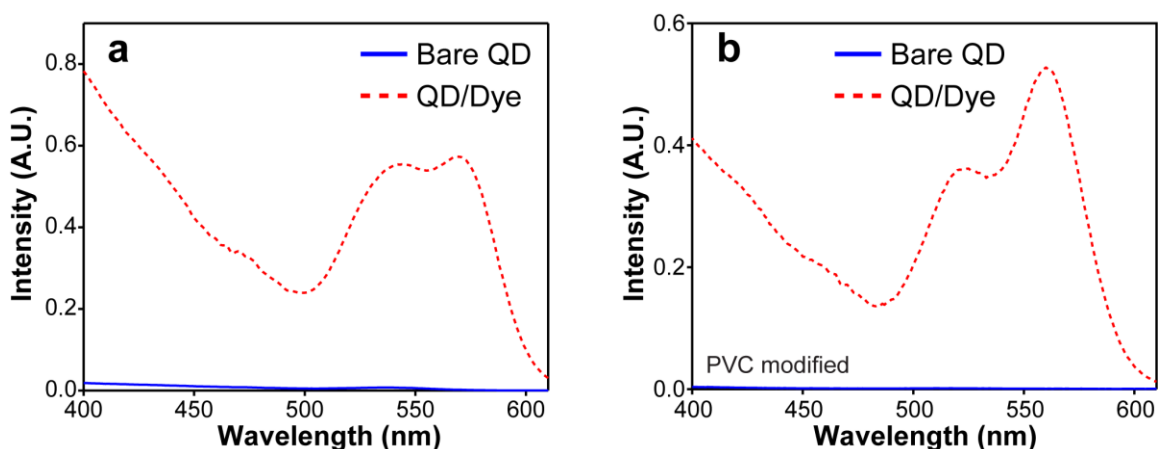

**Figure S7.** Photoluminescence excitation spectra of (a) water-soluble and (b) PVC modified water-soluble QDs (blue solid) and the same conjugated to the bisulfide-reactive carboxyrhodamine dye (red dash) measured by the intensity of emission at 620 nm, near the maximum of the dye fluorescence. The mixture of QD and dye-like features in the coupled chromophore and the relatively weak intensity of the neat QD sample are indicative of energy transfer from the QD to the dye.

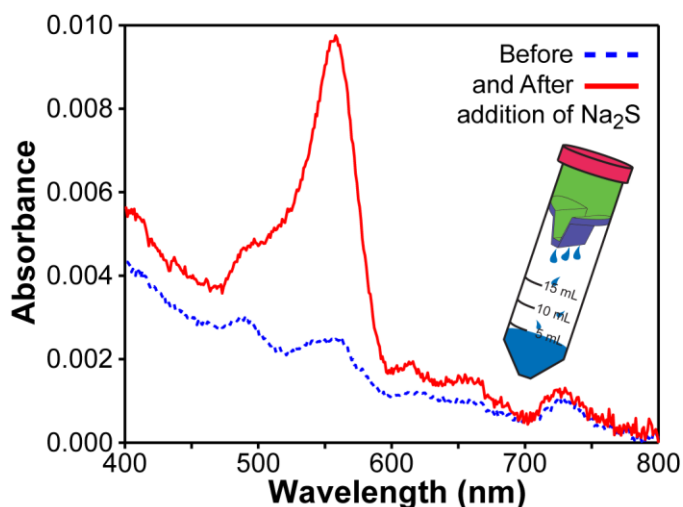

**Figure S8.** The absorption spectra of the filtrate from a QD/sulfide reactive dye coupled chromophore before and after exposure to  $\text{Na}_2\text{S}$  reveals that the presence of rhodamine dye in the filtrate after bisulfide exposure. This must be due to reduction of the S-S bond that links the quantum dot and dye.

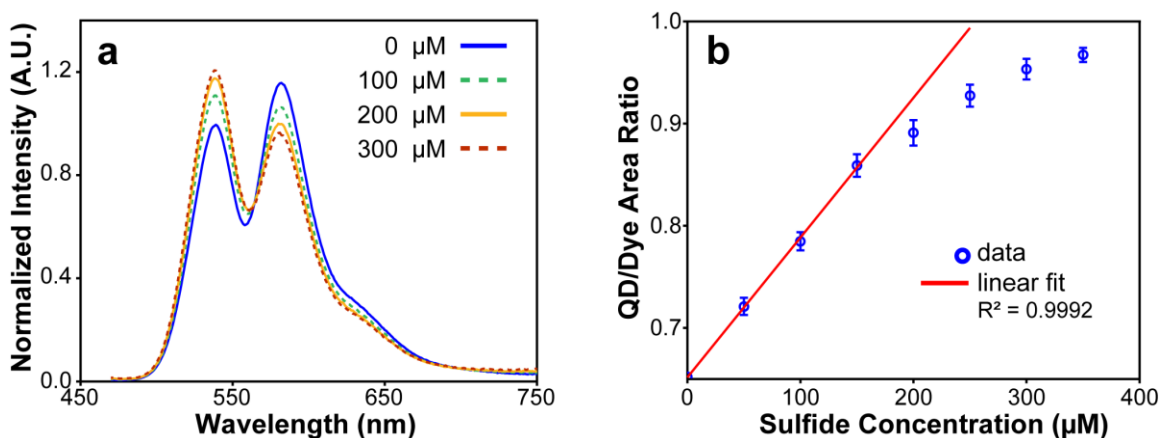

**Figure S9.** (a) Emission spectra of QD/rhodamine B piperazine conjugated chromophore in the presence of increasing concentrations of  $\text{Na}_2\text{S}$ . (b) Calibration data from the ratio of the integrated emission of the QD donor over the dye acceptor as a function of  $\text{HS}^-$  concentration reveal a roll-off of the response at higher levels of bisulfide that is not observed in the QD/ bisulfide-reactive carboxyrhodamine dye conjugate.

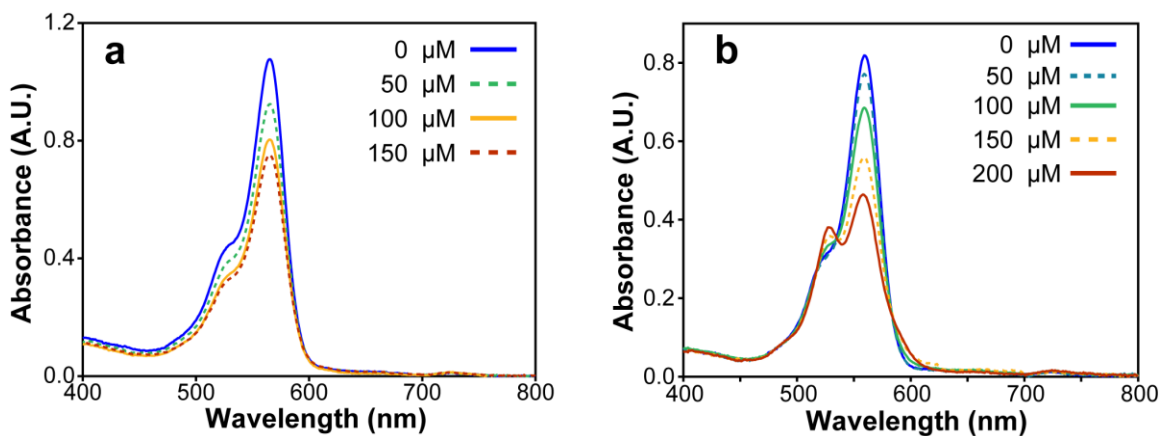

**Figure S10.** (a) Absorbance changes of Rhodamine B piperazine due to increasing exposure to  $\text{Na}_2\text{S}$  solution. (b) Absorbance changes of compound 8 due to increasing exposure to  $\text{Na}_2\text{S}$  solution.

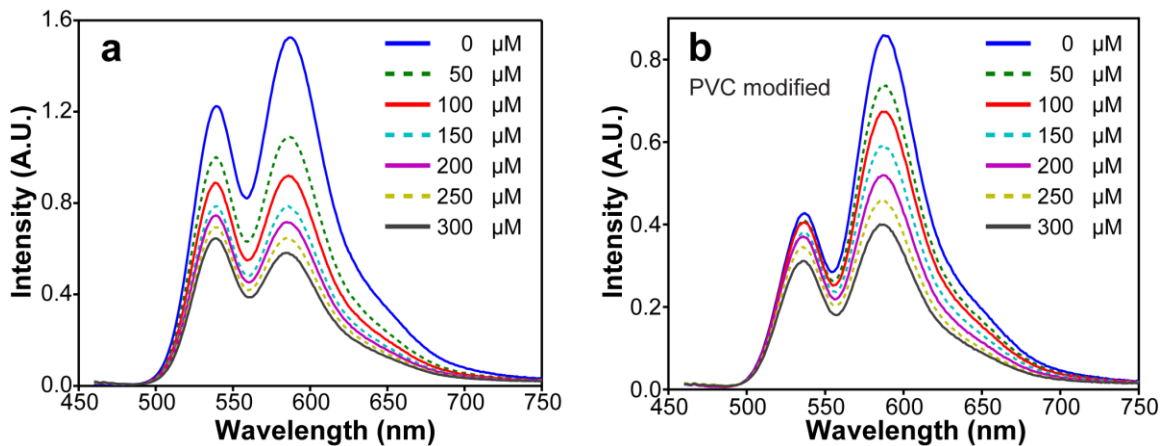

**Figure S11.** (a) Raw emission spectra of a) QD/sulfide reactive dye coupled chromophore, the normalized data from which appear in the main text (Figure 1a) and (b) PVC modified QD/sulfide reactive dye in the presence of increasing concentrations of  $\text{Na}_2\text{S}$ . The data show that the quantum dot emission is less perturbed in the plastic coated sample.

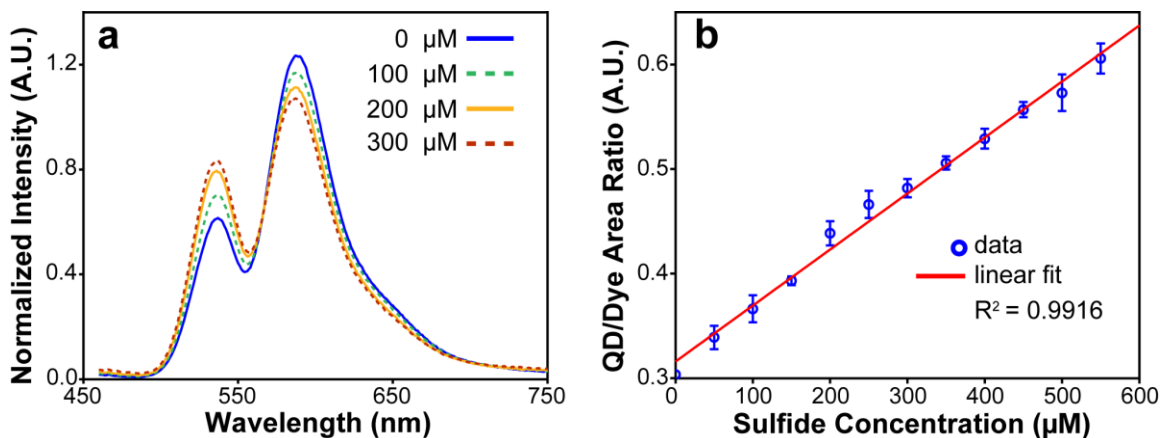

**Figure S12.** (a) Normalized emission of the PVC modified QD/bisulfide reactive dye sensor ( $3.4 \times 10^{-8}$  M) upon exposure to  $\text{HS}^-$  (raw data appear in Figure S6b). (b) Ratio of the integrated emission of the QD donor over the dye acceptor as a function of  $\text{HS}^-$  concentration. The detection limit was determined to be  $41.9 \pm 0.3$   $\mu\text{M}$  for a QD sensor concentration of  $3.4 \times 10^{-8}$  M.

### PVC Modified QDs:

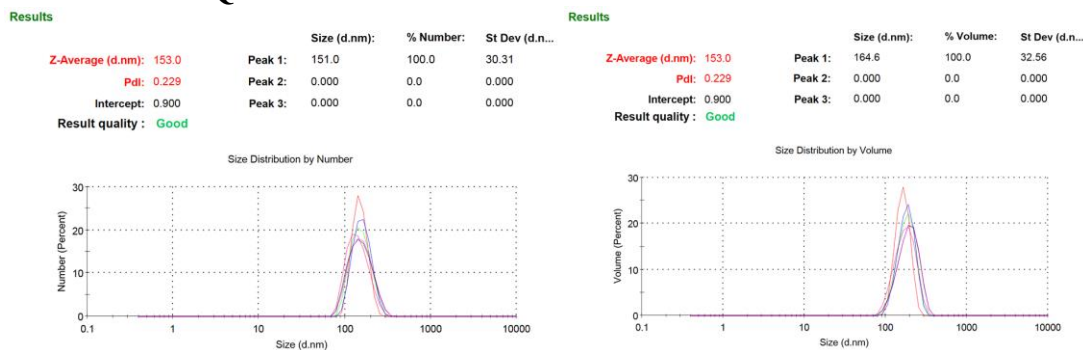

### Uncoated QD:

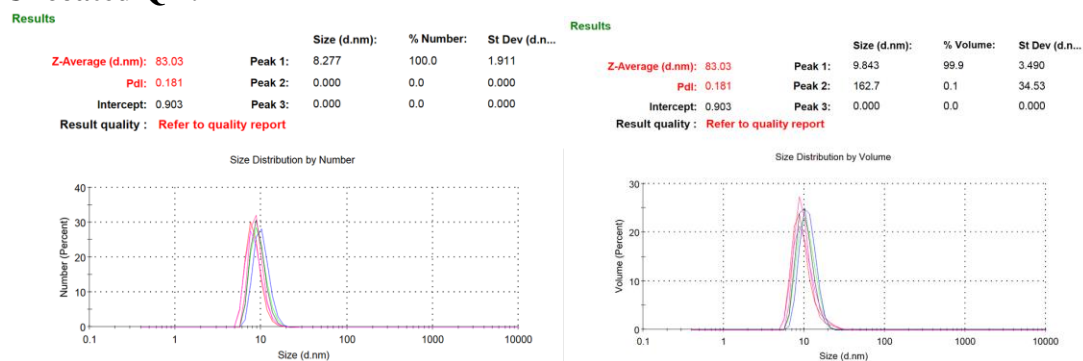

**Figure S13.** DLS data show that the PVC modified QDs are significantly larger than the unmodified QD samples in water.



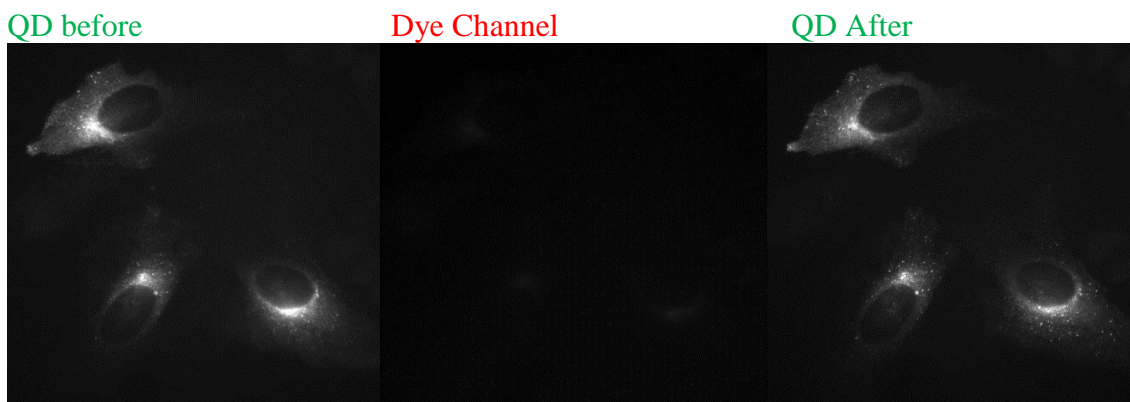

**Figure S14.** Fluorescence images of water-soluble QDs microinjected into live HeLa cells in the QD channel ( $535 \pm 25$  nm) before after treatment with  $\text{Na}_2\text{S}$  solution ( $200 \mu\text{M}$ ) reveal a slight loss of QD intensity. Relatively little QD emission is observed to bleed through the dye channel ( $610 \pm 37.5$  nm).

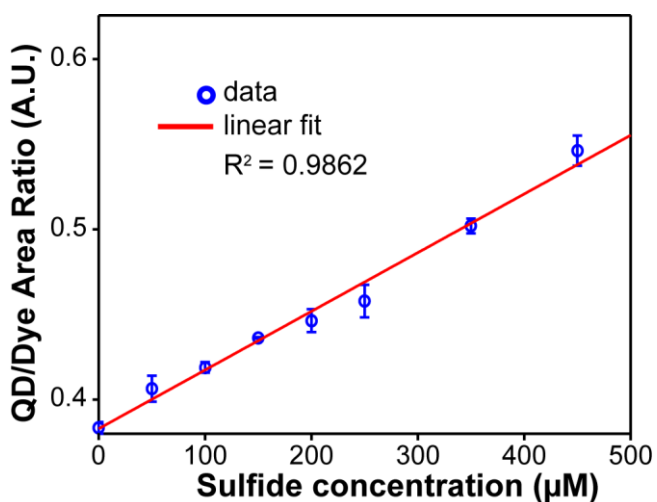

**Figure S15.** Calibration data from QD/bisulfide-reactive dye conjugates diluted in  $\text{HS}^-$  standards imaged using the fluorescence microscope, where the ratio is determined from the intensity of the QD channel divided by the intensity of the dye channel.

| Cell | Signal Before H <sub>2</sub> S Addition | Signal Before H <sub>2</sub> S Addition | Signal After H <sub>2</sub> S Addition | Signal After H <sub>2</sub> S Addition | Change (%)  | Change (%)   |
|------|-----------------------------------------|-----------------------------------------|----------------------------------------|----------------------------------------|-------------|--------------|
|      | QD                                      | DYE                                     | QD                                     | DYE                                    | QD          | DYE          |
| 1    | 1015.884                                | 993.155                                 | 1176.631                               | 634.981                                | <b>15.8</b> | <b>-36.1</b> |
| 2    | 1208.503                                | 1194.916                                | 1532.603                               | 811.09                                 | <b>26.8</b> | <b>-32.1</b> |
| 3    | 1169.455                                | 1193.748                                | 1304.247                               | 819.378                                | <b>11.5</b> | <b>-31.4</b> |
| 4    | 1073.273                                | 1075.251                                | 1133.617                               | 715.045                                | <b>5.6</b>  | <b>-33.5</b> |
| 5    | 1118.225                                | 1182.337                                | 1349.92                                | 860.206                                | <b>20.7</b> | <b>-27.2</b> |
| 6    | 953.788                                 | 918.549                                 | 1194.263                               | 752.866                                | <b>25.2</b> | <b>-18.0</b> |
| 7    | 866.634                                 | 791.696                                 | 977.993                                | 556.096                                | <b>12.8</b> | <b>-29.8</b> |
| 8    | 1006.004                                | 987.425                                 | 1273.38                                | 728.854                                | <b>26.6</b> | <b>-26.2</b> |
| 9    | 1011.291                                | 953.29                                  | 1036.63                                | 643.868                                | <b>2.5</b>  | <b>-32.5</b> |
| 10   | 1339.572                                | 1333.454                                | 1695.319                               | 1003.261                               | <b>26.6</b> | <b>-24.8</b> |
| 11   | 1178.619                                | 1141.231                                | 1329.944                               | 880.514                                | <b>12.8</b> | <b>-22.8</b> |
|      |                                         |                                         |                                        | <b>Average</b>                         | <b>17.0</b> | <b>-28.6</b> |
|      |                                         |                                         |                                        | <b>Error</b>                           | <b>±8.7</b> | <b>±5.3</b>  |

**Table S1.** QD-Dye signal intensity changes after treatment with Na<sub>2</sub>S solution (200 μM).

| <b>Cell</b> | <b>Signal Before H<sub>2</sub>S Addition</b> | <b>Signal After H<sub>2</sub>S Addition</b> | <b>Change (%)</b> |
|-------------|----------------------------------------------|---------------------------------------------|-------------------|
|             | <b>QD</b>                                    | <b>QD</b>                                   | <b>QD</b>         |
| 1           | 960.627                                      | 852.404                                     | <b>-11.3</b>      |
| 2           | 960.56                                       | 888.141                                     | <b>-7.5</b>       |
| 3           | 956.923                                      | 931.068                                     | <b>-2.7</b>       |
| 4           | 1160.918                                     | 1074.255                                    | <b>-7.5</b>       |
| 5           | 1030.104                                     | 1003.889                                    | <b>-2.5</b>       |
| 6           | 1026.269                                     | 940.882                                     | <b>-8.3</b>       |
| 7           | 1824.029                                     | 1604.722                                    | <b>-12.0</b>      |
| 8           | 1098.516                                     | 1004.57                                     | <b>-8.6</b>       |
| 9           | 1234.09                                      | 1109.095                                    | <b>-10.1</b>      |
| 10          | 1185.644                                     | 928.704                                     | <b>-21.7</b>      |
|             |                                              | <b>Average</b>                              | <b>-9.2</b>       |
|             |                                              | <b>Error</b>                                | <b>± 5.4</b>      |

**Table S2.** Control experiment on water-soluble QDs after treatment with Na<sub>2</sub>S solution (200 μM).
